# Supplementary material
Source: publisher figshare collection journal article supplement (https://sage.figshare.com/ndownloader/files/14375945)
Supplement: Supplementary file 1 [file 14375945]

| **Score** |  |
| --- | --- |
| **0 Friendly and confident** | Cat is loveable with attention seeking. Will approach handler for interaction. |
| **1-8 Friendly and shy** | Cat is friendly and loveable when handled but will not seek interaction with handler. |
| **9-18 Withdrawn and protective** | Cat remains ridged and appears uneasy when handled. Handler does not feel in danger of being attacked by cat. |
| **19-24 Withdrawn and aggressive** | Cat is ridged or frozen and may demonstrate pawing, biting, or clawing when handled. Handler may feel in danger of being injured while handling. |
| **25 Overtly aggressive** | Handler is at risk of being injured when handling this cat. Cat makes aggressive gestures including hissing, growling, pawing, clawing, and rapid aggressive movement. |

Table 2 Behavioral descriptions used to evaluate handling scores

Adapted from Zeiler GE, Fosgate GT, van Vollenhoven E, et al 2013, SAGE Publications
